# Supplementary material for: Planar carbon electrodes for real-time quantification of hydrogen sulfide release from cells
Source: Royal Society of Chemistry journal article supplement (doi:10.1039/d2sd00179a), 2022-12-01
Supplement: d2sd00179a1.pdf [file d2sd00179a1.pdf]

## Supporting Information

### **Planar carbon electrodes for real-time quantification of hydrogen sulfide release from cells**

*Jackson R. Hall<sup>a</sup>, James B. Taylor<sup>a</sup>, Taron M. Bradshaw<sup>a</sup>, Mark H. Schoenfish<sup>\*,a,b</sup>*

<sup>a</sup> Department of Chemistry, The University of North Carolina at Chapel Hill, Chapel Hill, North Carolina 27599, United States

<sup>b</sup> Division of Pharmacoengineering and Molecular Pharmaceutics, UNC Eshelman School of Pharmacy, Chapel Hill, NC 27599, United States

\*Email: schoenfish@unc.edu

### Table of Contents

|                                                                                 |            |
|---------------------------------------------------------------------------------|------------|
| 1. Table of electrochemical hydrogen sulfide sensors used to monitor live cells | Table S-1  |
| 2. Mask schemes for the two SPCE designs                                        | Figure S-1 |
| 3. Cyclic voltammograms of <i>o</i> -PD upon GC electrodes and SPCEs            | Figure S-2 |
| 4. Repeated standard calibration curves on bare and <i>o</i> -PD coated SPCEs   | Figure S-3 |

**Table S-1.** Comparison of various, recent hydrogen sulfide electrochemical sensors used to detect hydrogen sulfide release from live cells.

| <b>Electrode Material</b>                                                                           | <b>Method</b> | <b>Limit of Detection</b> | <b>Sensitivity</b>                      | <b>Response Time</b> | <b>Cell type</b>                               | <b>Reference</b> |
|-----------------------------------------------------------------------------------------------------|---------------|---------------------------|-----------------------------------------|----------------------|------------------------------------------------|------------------|
| SPCE ( <i>o</i> -PD/2x XG)                                                                          | Amperometry   | 80 nM                     | 1.71 nA/ $\mu$ M                        | 16.8 $\pm$ 7.4s      | HUVEC                                          | This work        |
| PEDOT-modified nanoporous gold microelectrode                                                       | Amperometry   | 0.1 $\mu$ M               | 0.125 nA/ $\mu$ M                       | 1s                   | HeLa                                           | 1                |
| LDH wrapped carbon nanotubes                                                                        | Amperometry   | 0.3 nM                    | 73 $\mu$ A/mM cm <sup>-2</sup>          | 3s                   | Sulfate reducing bacteria; Melanoma (A375)     | 2                |
| Reduced graphene oxide-MoS <sub>2</sub>                                                             | Amperometry   | 10 nM                     | 0.0008 $\mu$ A/ $\mu$ M                 | <5s                  | E. coli                                        | 3                |
| PtNi alloy nanoparticles                                                                            | Amperometry   | 0.004 $\mu$ M             | 0.323 $\mu$ A/ $\mu$ M cm <sup>-2</sup> | 4.8s                 | Breast cancer (MDA-MB-231); Fibroblasts (L929) | 4                |
| rGO/Fe <sub>3</sub> O <sub>4</sub> /Cu <sub>2</sub> O NSs modified magnetic glassy carbon electrode | CV            | 230 pM                    | --                                      | --                   | HeLa                                           | 5                |

### References for table 1

- (1) Hu, X. B.; Liu, Y. L.; Zhang, H. W.; Xiao, C.; Qin, Y.; Duo, H. H.; Xu, J. Q.; Guo, S.; Pang, D. W.; Huang, W. H. Electrochemical Monitoring of Hydrogen Sulfide Release from Single Cells. *ChemElectroChem* **2016**, *3*, 1998–2002.
- (2) Asif, M.; Aziz, A.; Wang, Z.; Ashraf, G.; Wang, J.; Luo, H.; Chen, X.; Xiao, F.; Liu, H. Hierarchical CNTs@CuMn Layered Double Hydroxide Nanohybrid with Enhanced Electrochemical Performance in H<sub>2</sub>S Detection from Live Cells. *Anal. Chem.* **2019**, *91*, 3912–3920.
- (3) Jeromiyas, N.; Mani, V.; Chang, P. C.; Huang, C. H.; Salama, K. N.; Huang, S. T. Anti-Poisoning Electrode for Real-Time in-Situ Monitoring of Hydrogen Sulfide Release. *Sensors Actuators, B Chem.* **2021**, *326*, 128844.
- (4) Panda, A. K.; Keerthi, M.; Sakthivel, R.; Dhawan, U.; Liu, X.; Chung, R. J. Biocompatible Electrochemical Sensor Based on Platinum-Nickel Alloy Nanoparticles for In Situ Monitoring of Hydrogen Sulfide in Breast Cancer Cells. *Nanomater.* **2022**, *Vol. 12*, Page 258 **2022**, *12*, 258.
- (5) Gu, W.; Zheng, W.; Liu, H.; Zhao, Y. Electroactive Cu<sub>2</sub>O Nanocubes Engineered Electrochemical Sensor for H<sub>2</sub>S Detection. *Anal. Chim. Acta* **2021**, *1150*, 338216.

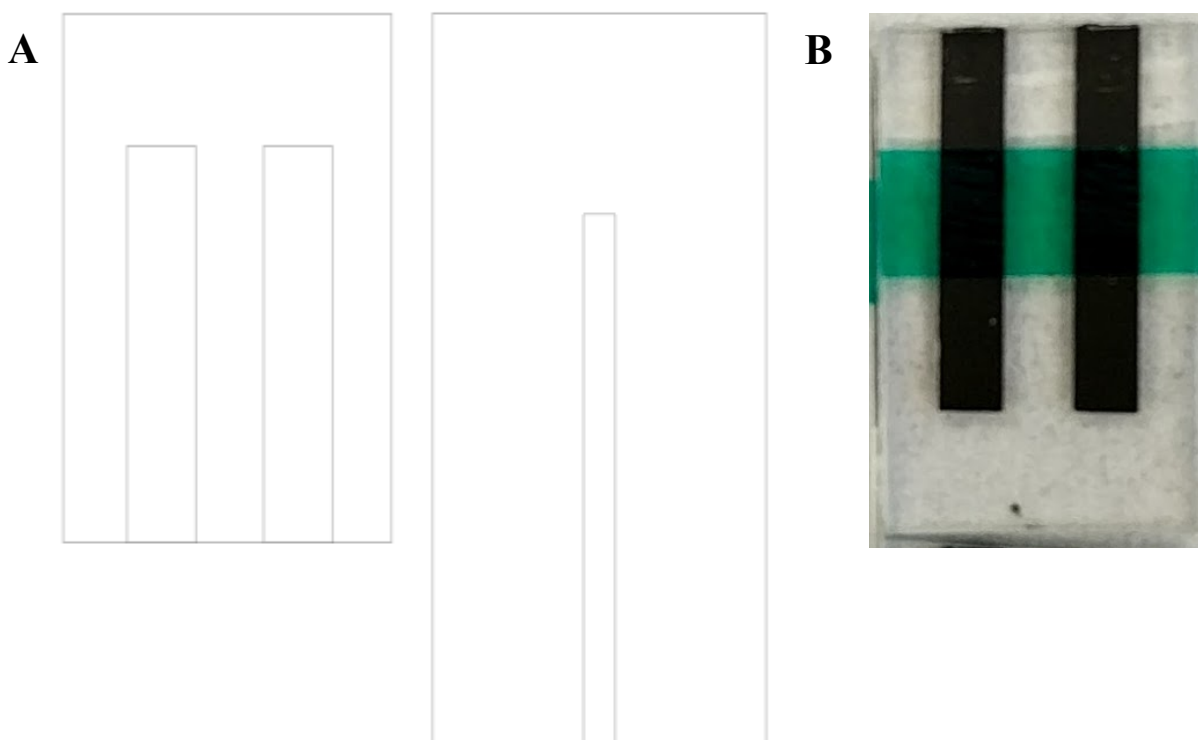

**Figure S-1.** Mask schemes for the two SPCE designs. (A) Vinyl mask designs. Left: dual electrode (3.2 mm x 19.0 mm) for analytical performance and selectivity measurements. Right: Single, thin electrode (1.6 mm x 25.4 mm) for cellular measurements. (B) Image of completed dual SPCE with Kapton tape (green) to demarcate working area (3.2 mm x 6.5 mm) from lead connections.

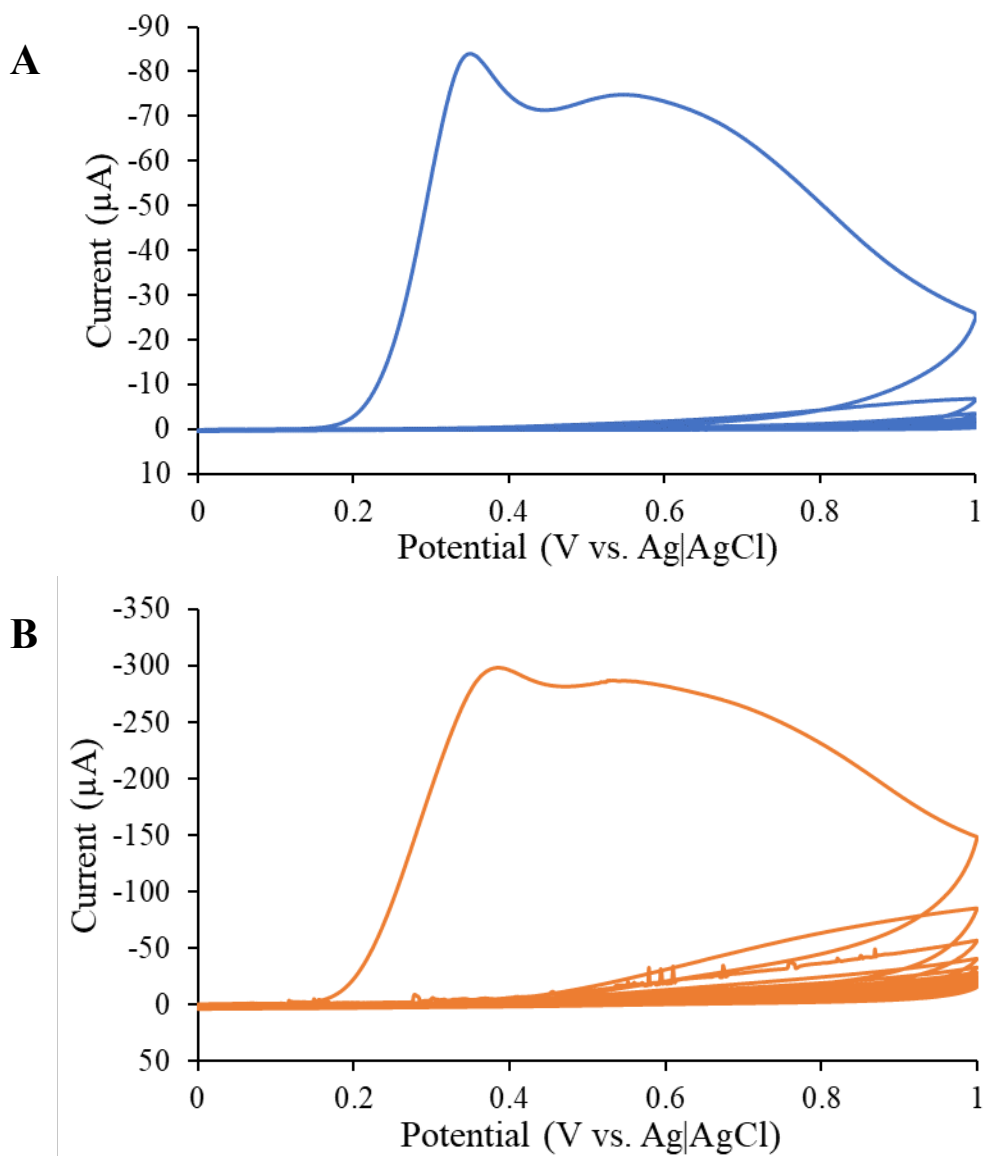

**Figure S-2.** Cyclic voltammograms of the electropolymerization of *o*-PD upon (A) glassy carbon electrodes and (B) SPCEs. Performed in 10 mM *o*-PD in 10 mM PBS, sweeping from 0.0 to +1.0 V at a scan rate of  $10 \text{ mV s}^{-1}$ . Initial sweep shows the characteristic peak at +0.4 V and prominent shoulder (+0.5 to +0.8 V). Subsequent sweeps are passivated by the deposited film.

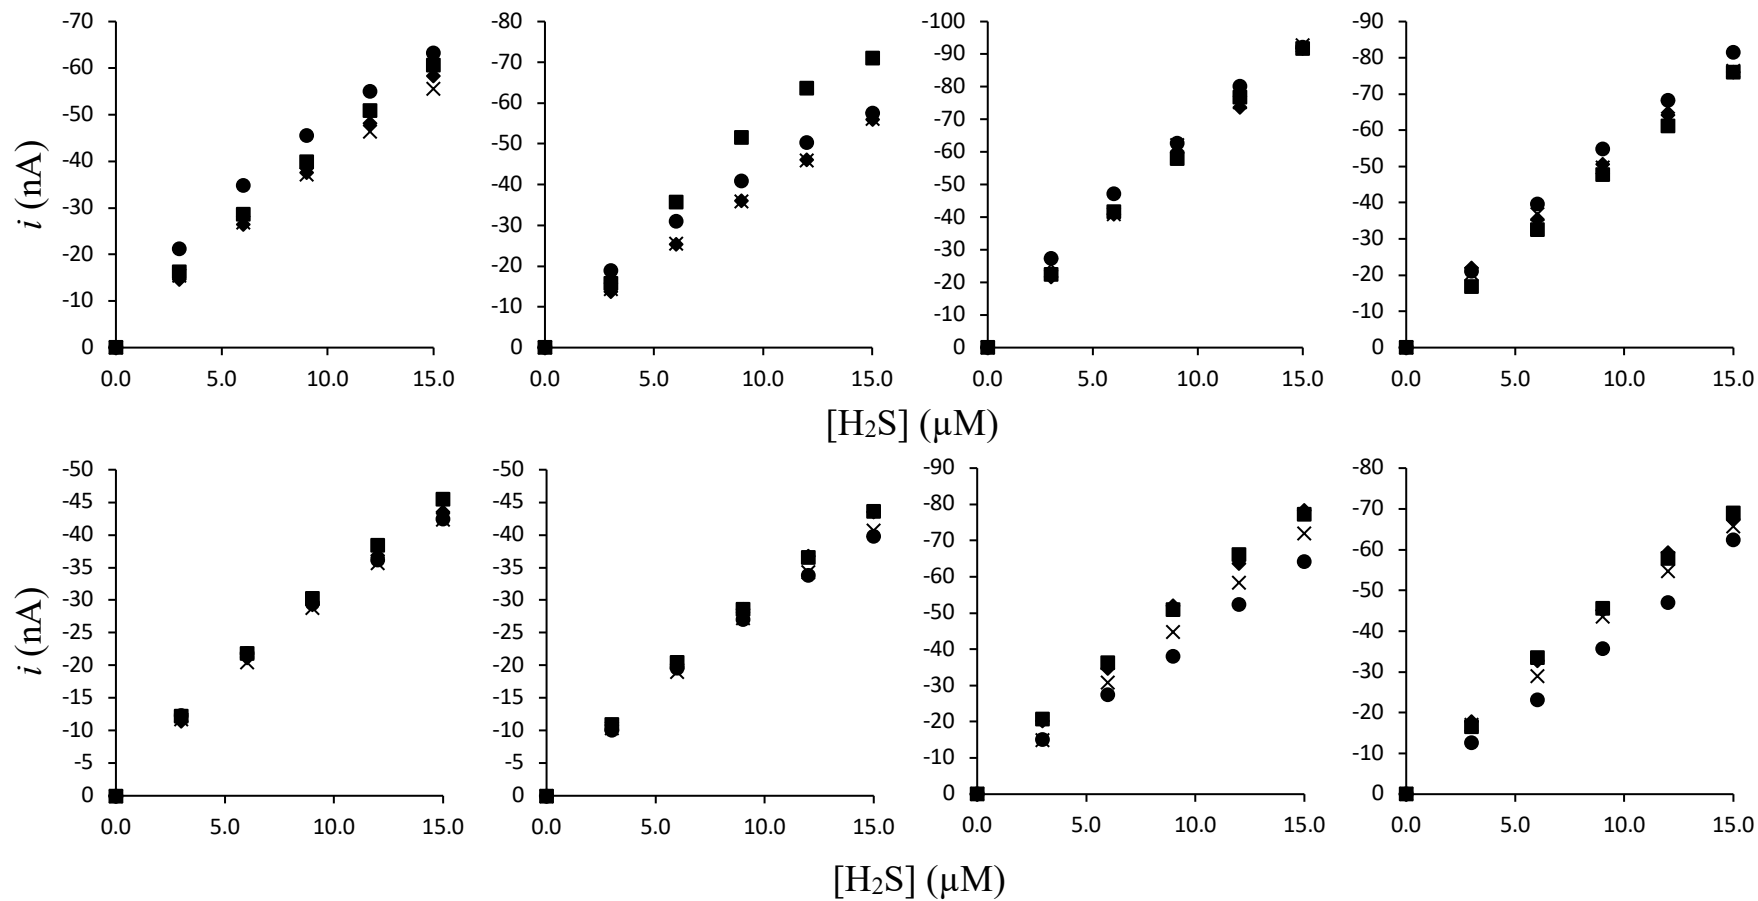

**Figure S-3.** Repeated standard calibrations performed on bare (Top row, N = 4) and poly-*o*-PD-coated (Bottom row, N = 4) SPCEs. Each graph is four consecutive standard calibrations performed using a single SPCE. Key for each graph: Calibration 1 (circle), Calibration 2 (X symbol), Calibration 3 (diamond), and Calibration 4 (square). All calibration curves had background current subtracted.
